# Supplementary material
Source: PubMed Central journal article supplement (PMC3956453)

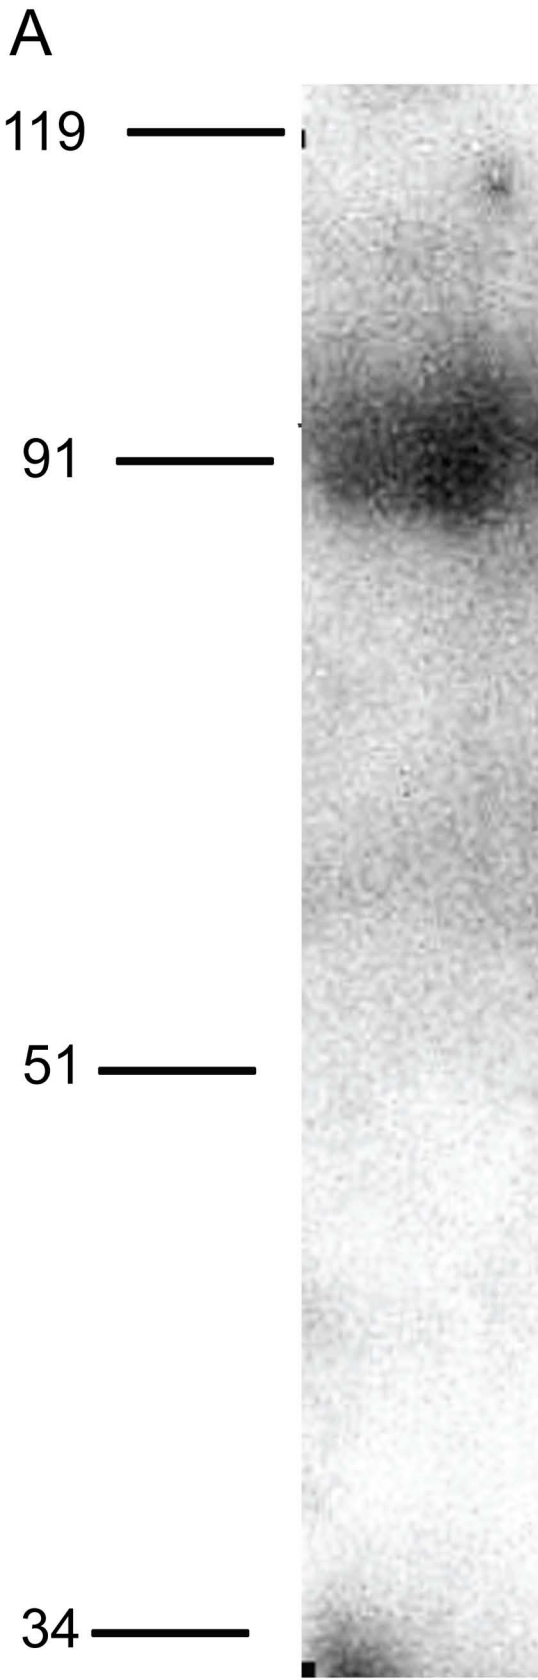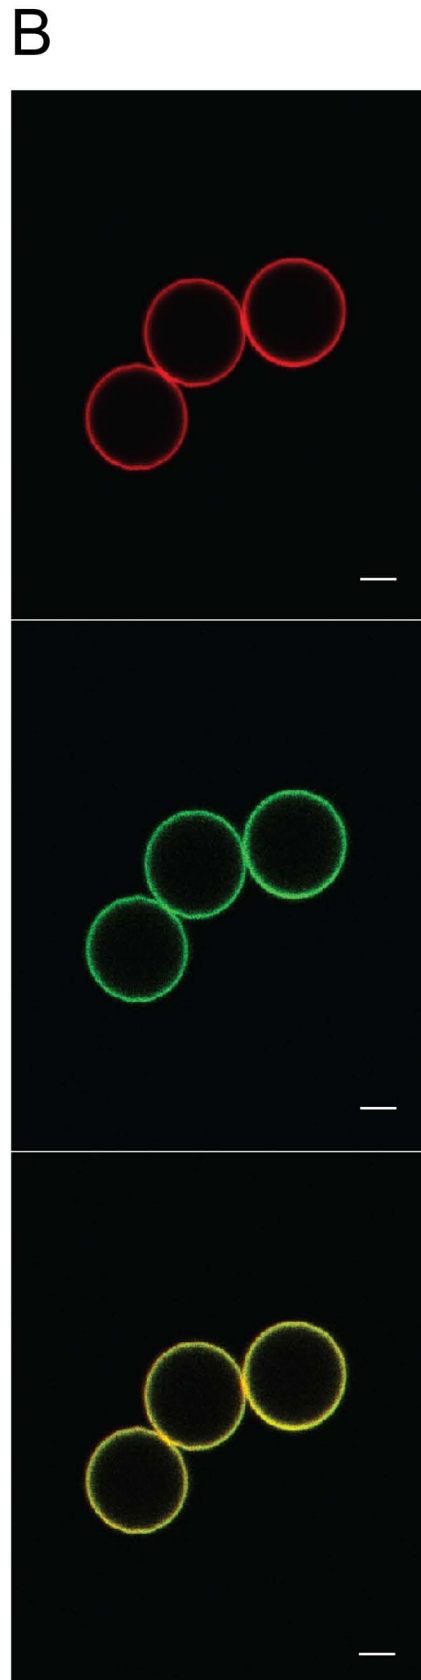

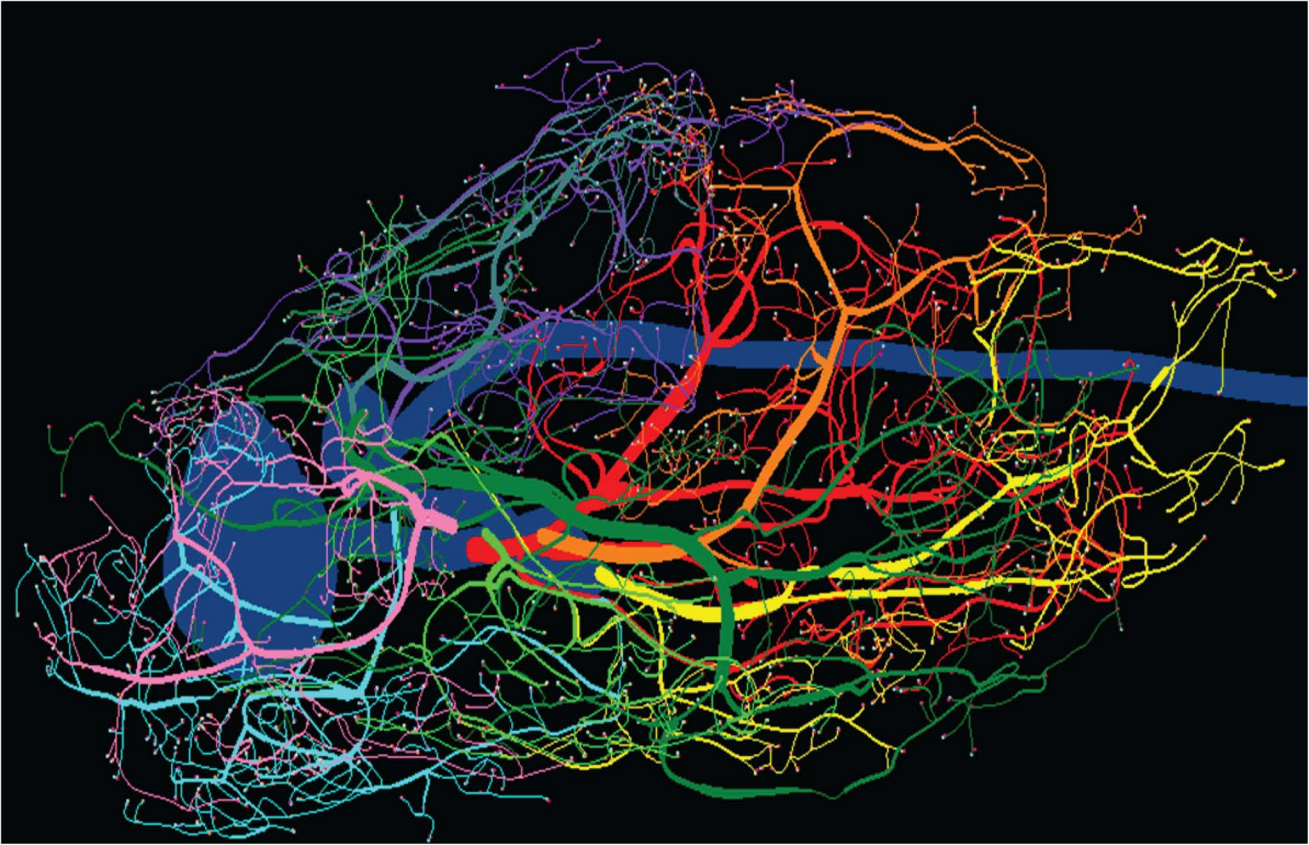

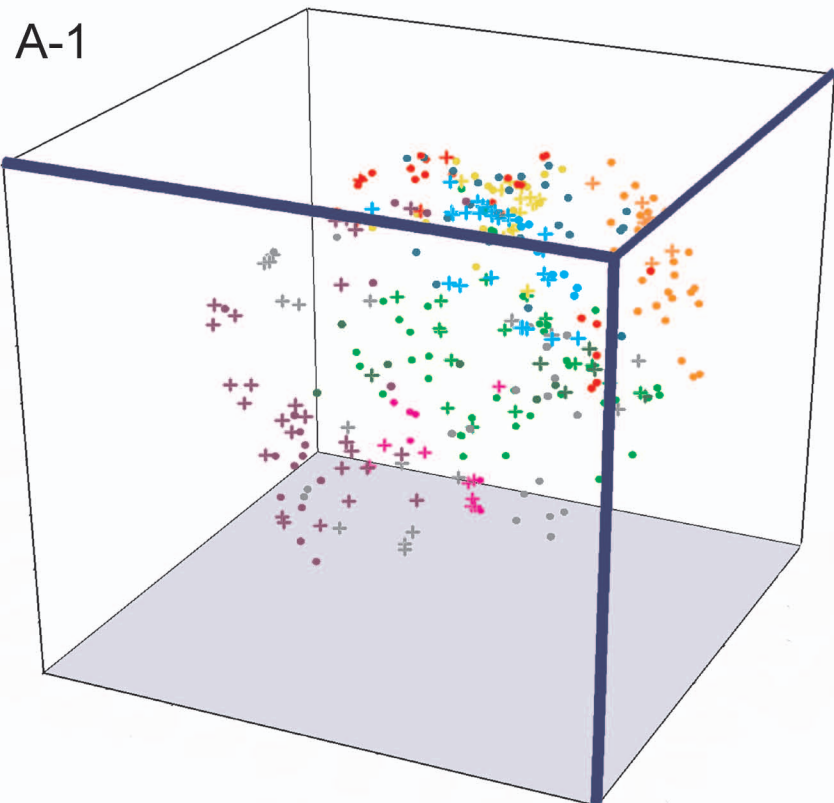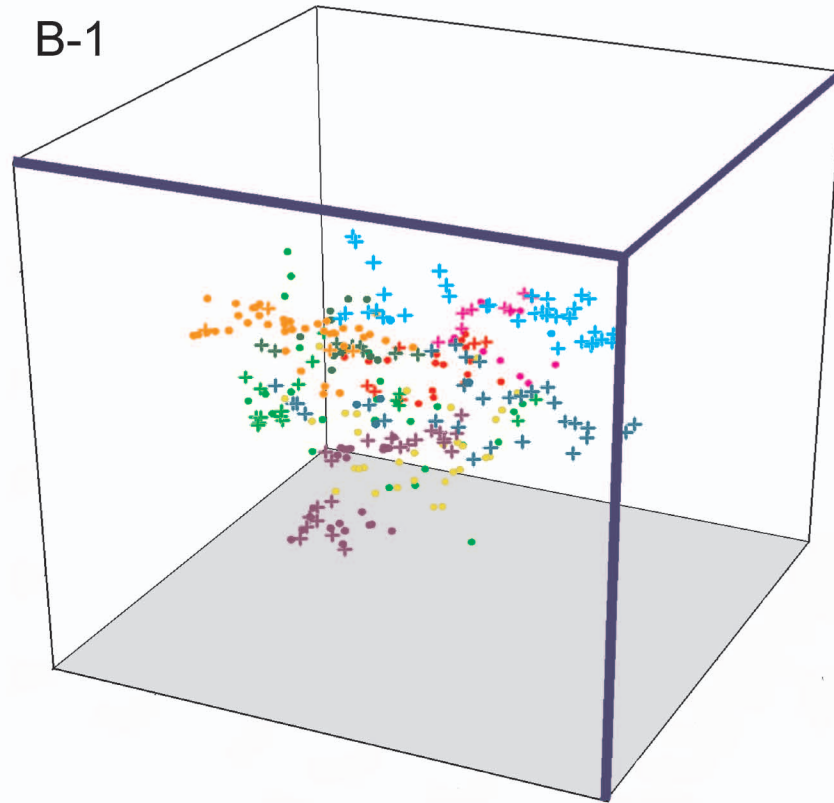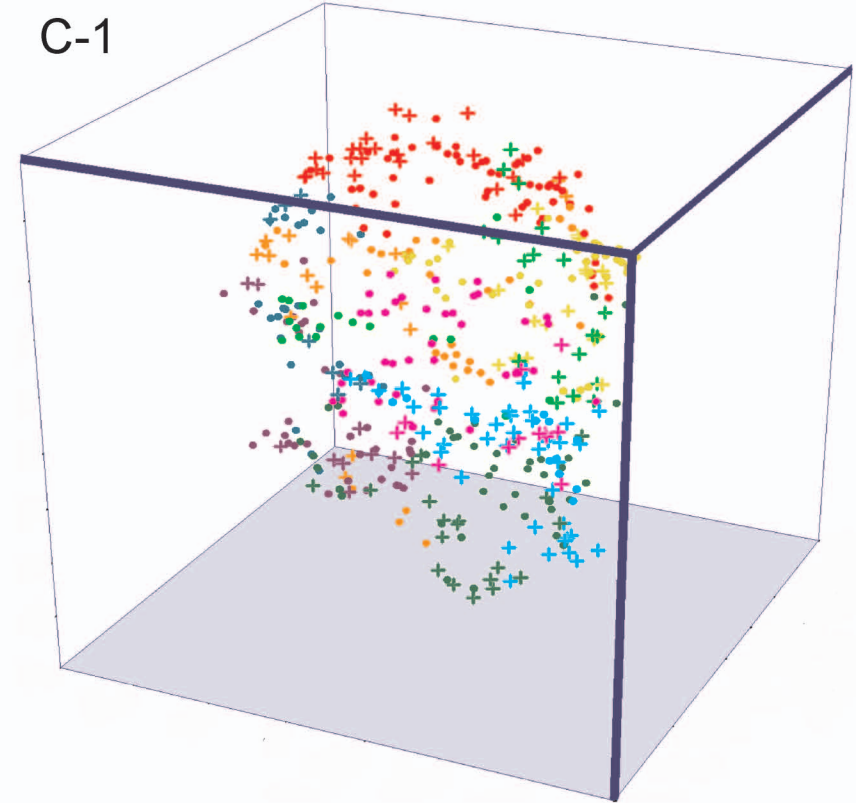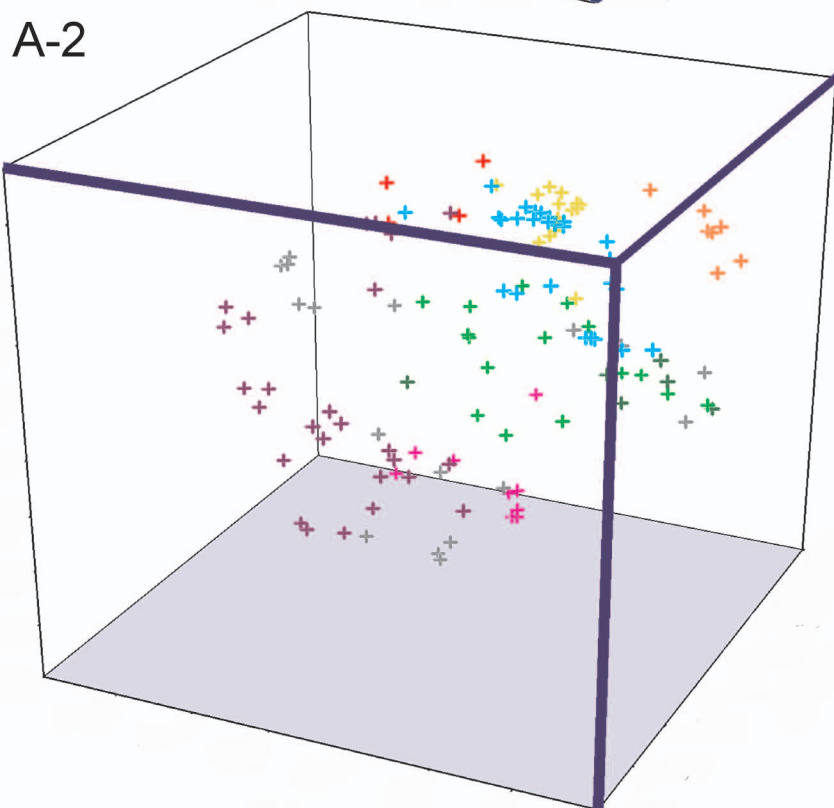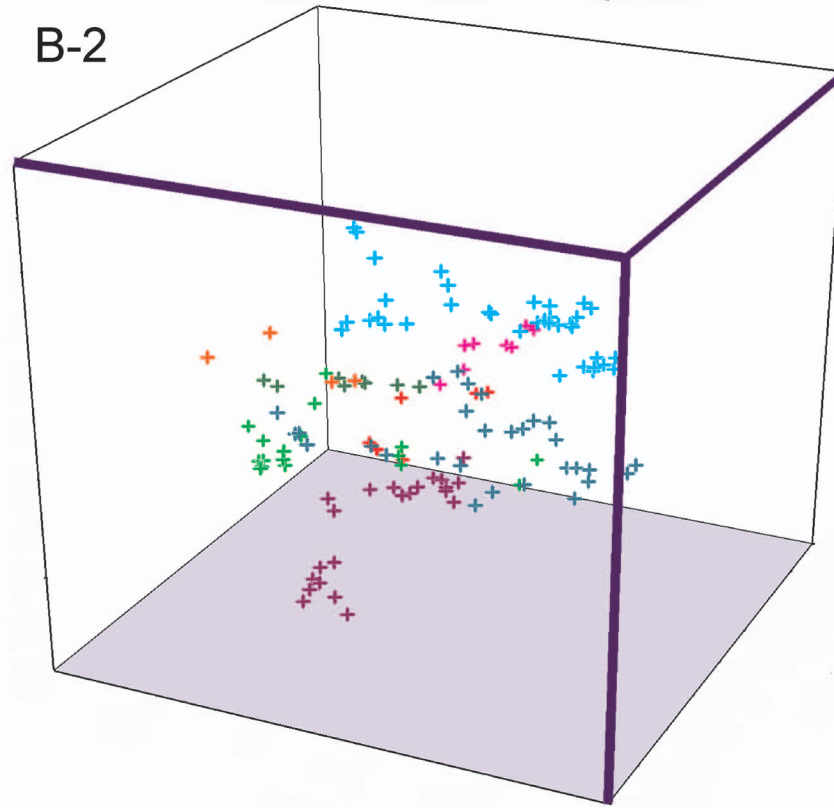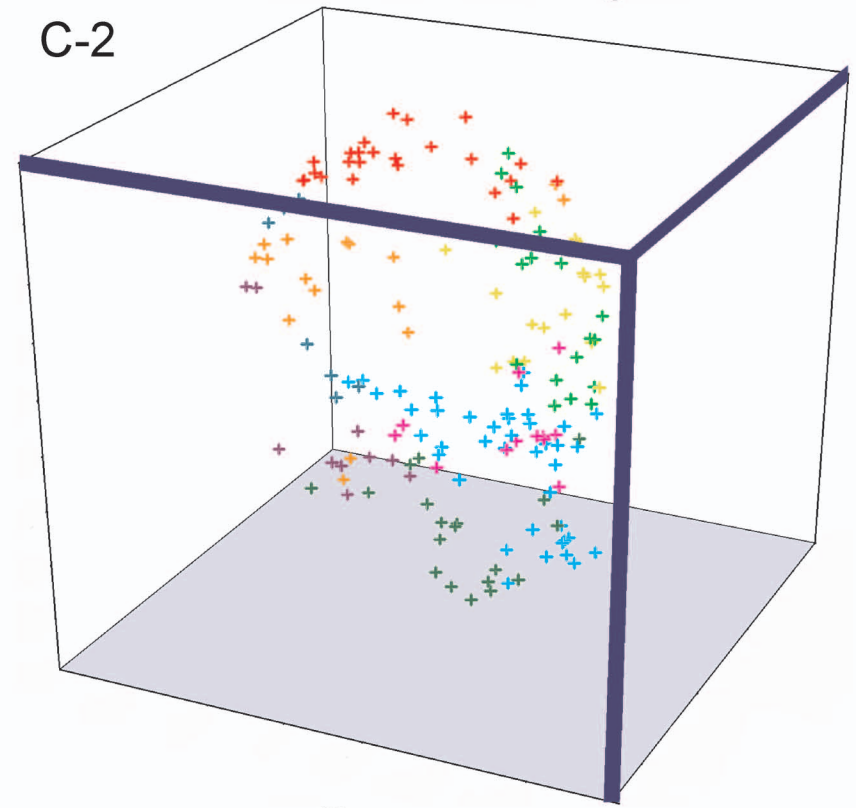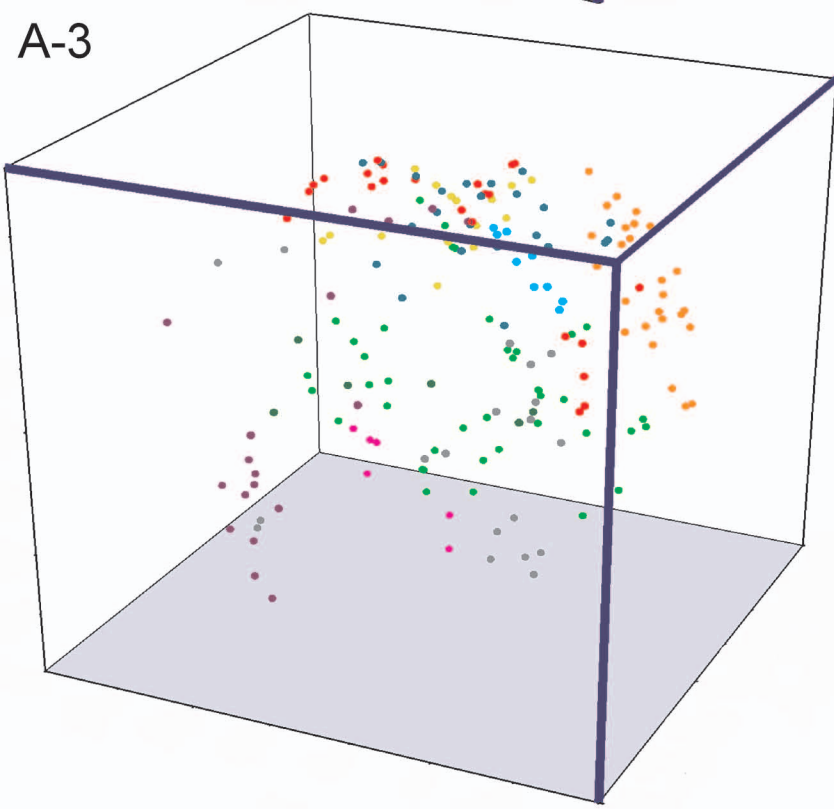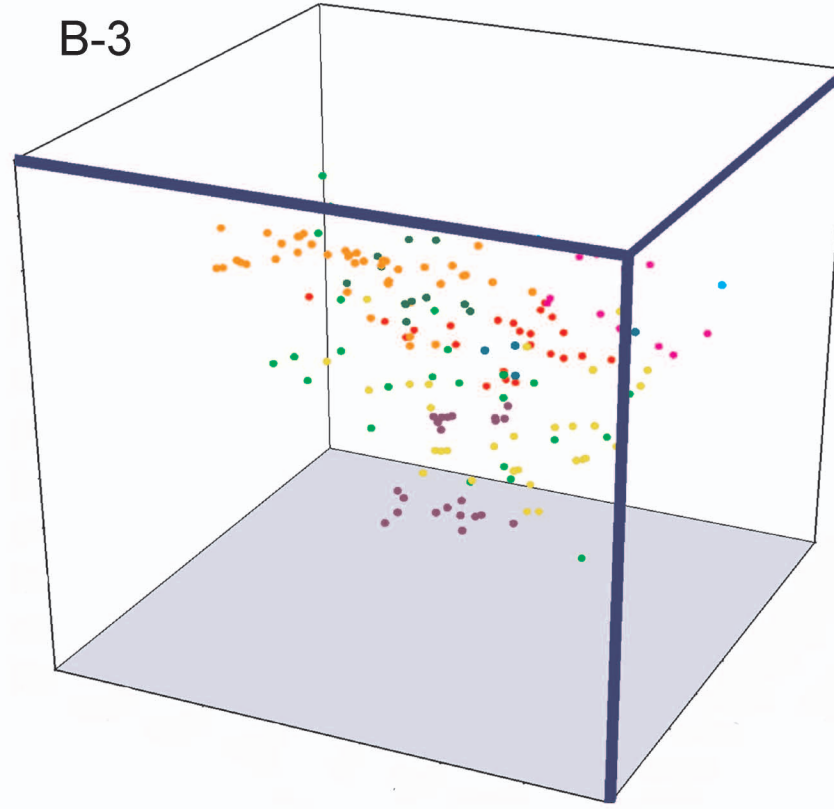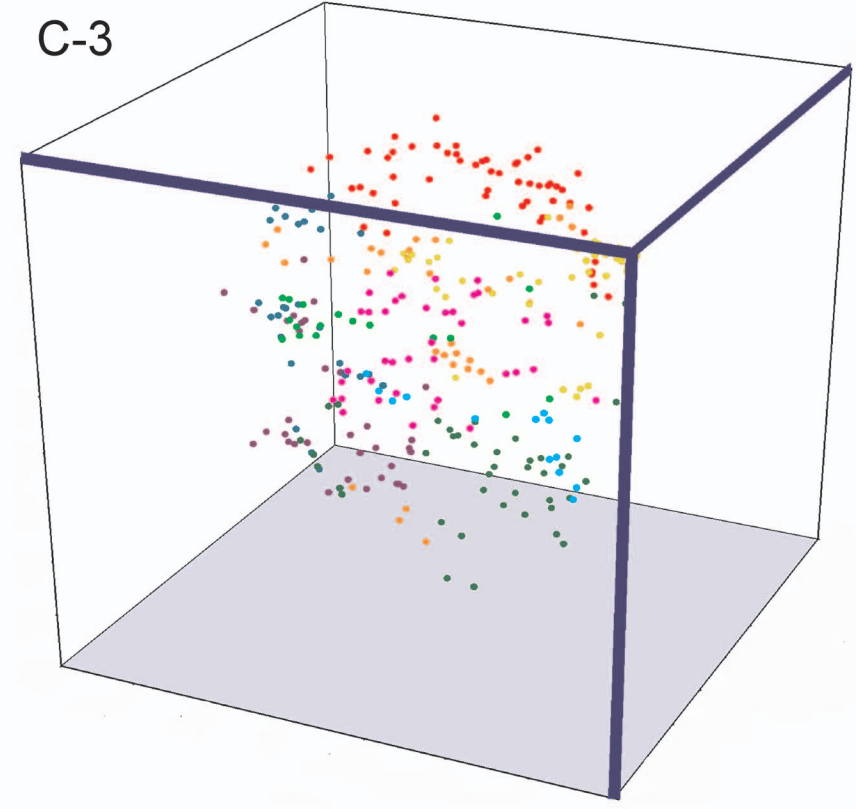



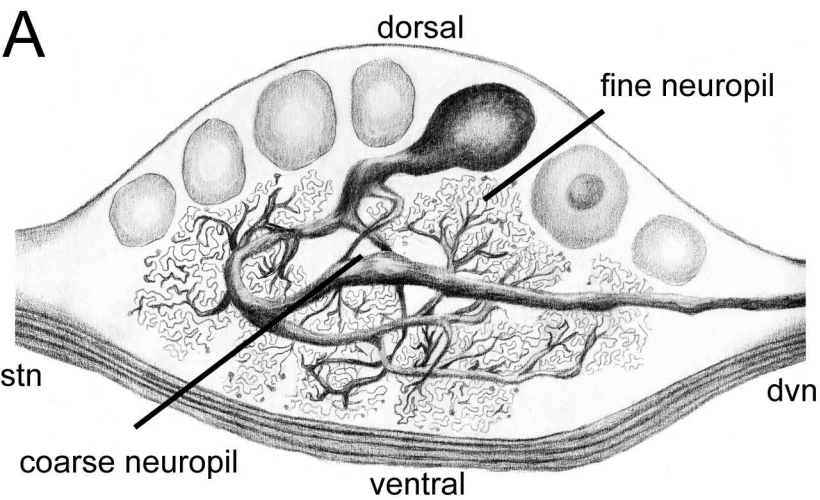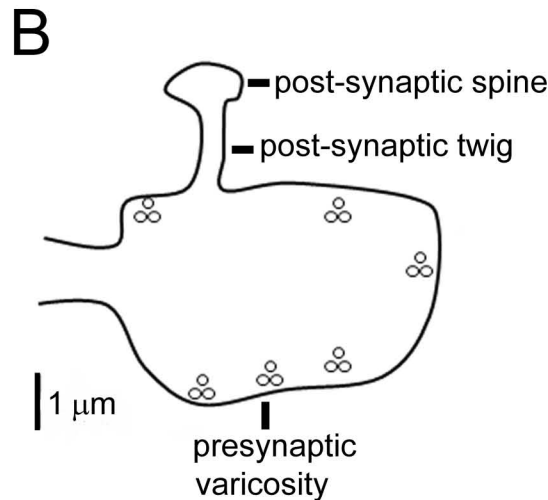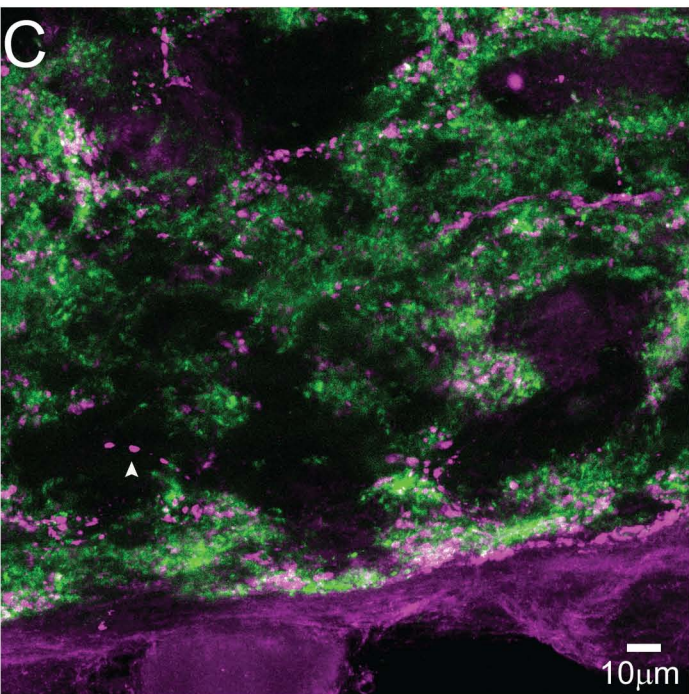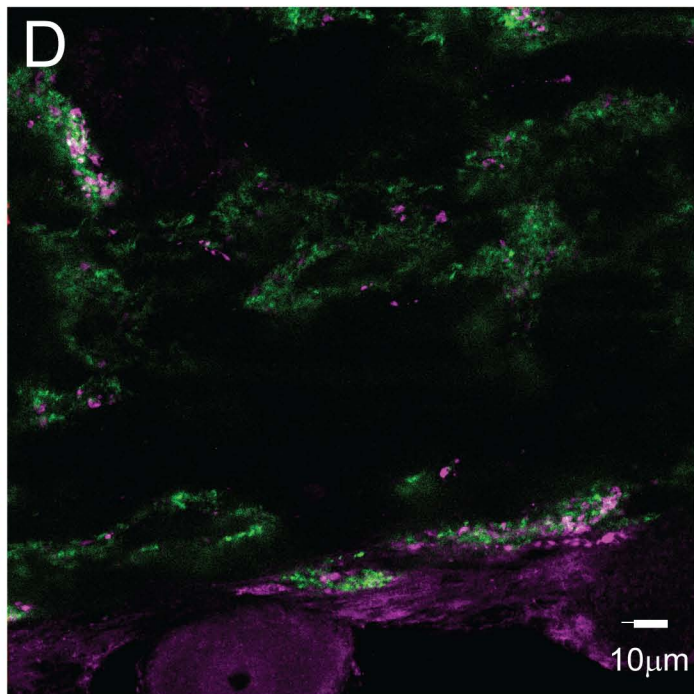

Figure S4



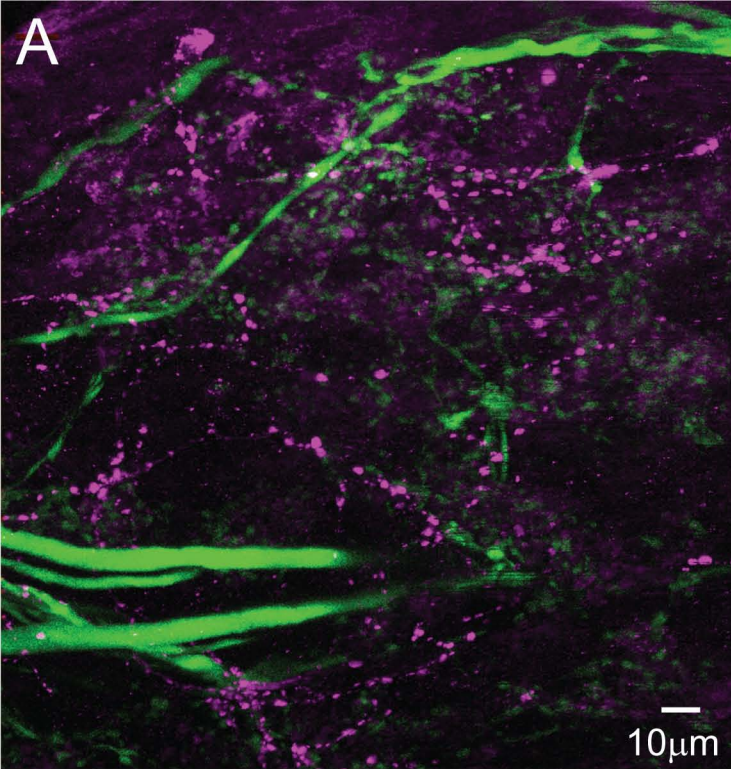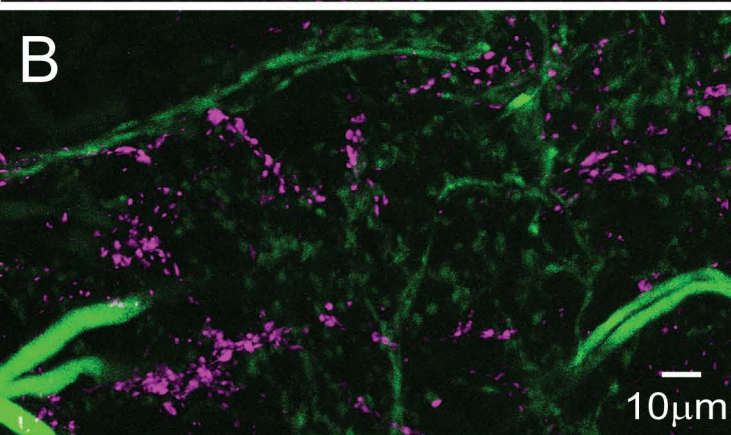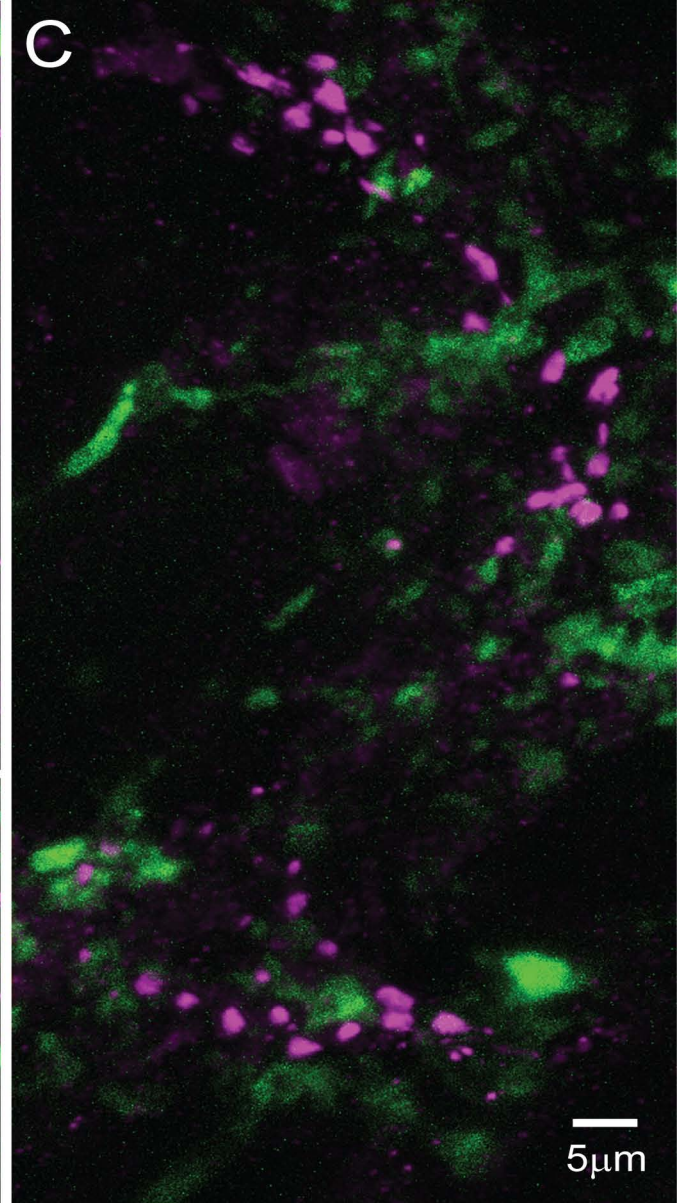

Figure S5



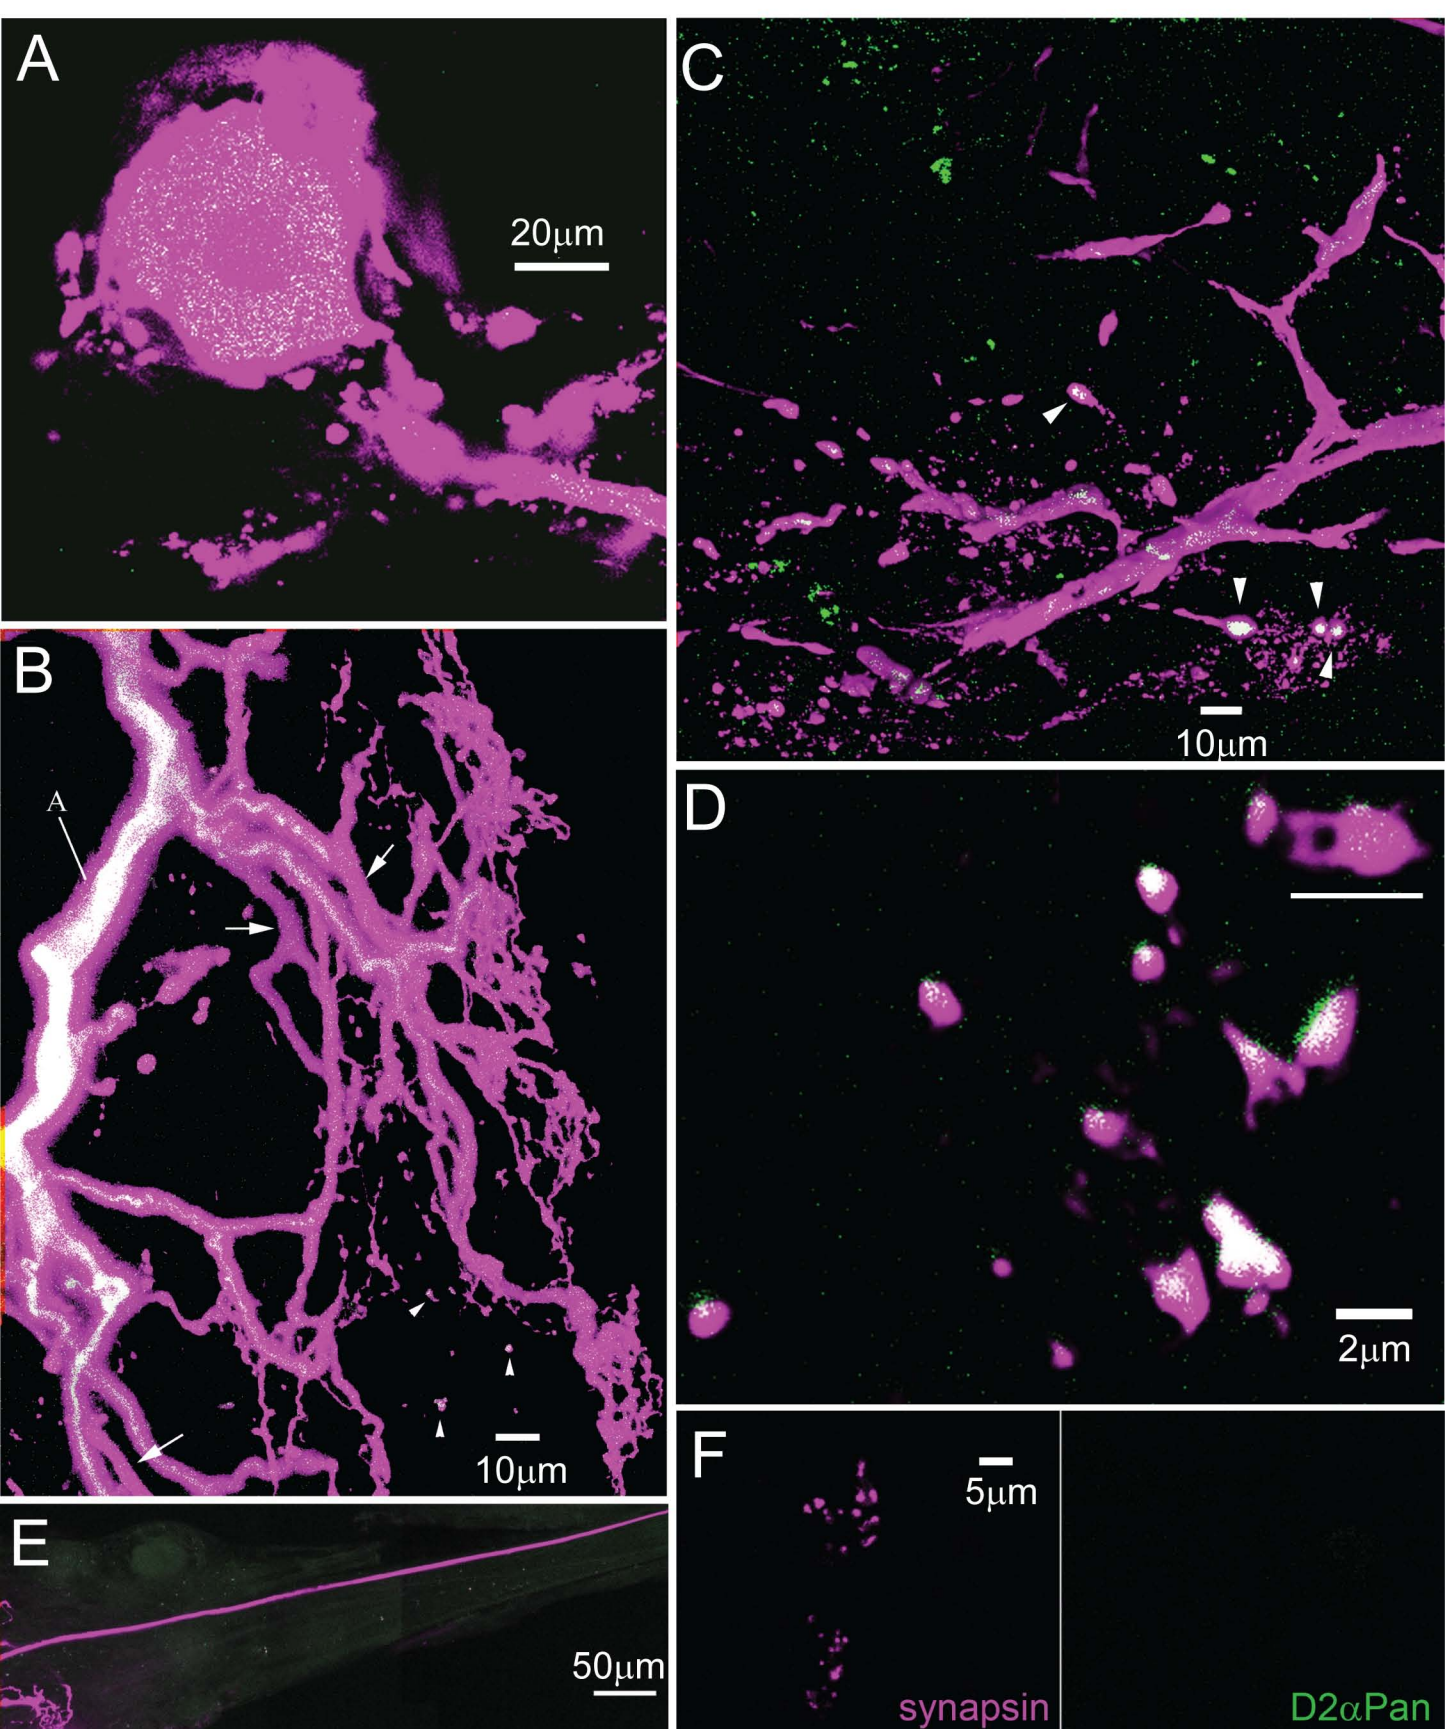

Figure S6

Supplement: NIHMS531274-supplement-Supp_Figure_S1-S6.pdf [file NIHMS531274-supplement-Supp_Figure_S1-S6.pdf]
